# Supplementary material
Source: MDPI journal article supplement (https://www.mdpi.com/2673-8112/1/2/41)
Supplement: s1 [file s1]

## Supplementary materials

**Table S1.** Size of the population in each age group from INSEE French census (Institut National de la Statistique et des Etudes Economiques) as of January 1<sup>st</sup>, 2021.

| Age class | Size       |
|-----------|------------|
| [0;4]     | 3,671,719  |
| [5;9]     | 4,084,036  |
| [10;14]   | 4,187,992  |
| [15;19]   | 4,140,996  |
| [20;24]   | 3,757,482  |
| [25;29]   | 3,713,426  |
| [30;34]   | 4,056,469  |
| [35;39]   | 4,231,788  |
| [40;44]   | 4,072,226  |
| [45;49]   | 4,512,223  |
| [50;54]   | 4,425,730  |
| [55;59]   | 4,359,376  |
| [60;64]   | 4,099,662  |
| [65;69]   | 3,899,944  |
| [70;74]   | 3,477,098  |
| $\geq 75$ | 6,373,536  |
| Total     | 67,063,703 |

**Table S2.** Proportions of mild ( $p_{im}^2$ ), moderate ( $p_{im}^3$ ) and severe ( $p_{im}^4$ ) infections by age  $m$  ( $1 \leq m \leq 16$ ) and by susceptibility status  $i$  ( $1 \leq i \leq 4$ ).

| Age class | $p_{1m}^2$ | $p_{1m}^3$ | $p_{1m}^4$ |
|-----------|------------|------------|------------|
| [0;4]     | 0,985      | 0,014      | 0,001      |
| [5;9]     | 0,979      | 0,020      | 0,001      |
| [10;14]   | 0,976      | 0,023      | 0,001      |
| [15;19]   | 0,960      | 0,038      | 0,003      |
| [20;24]   | 0,930      | 0,065      | 0,005      |
| [25;29]   | 0,900      | 0,091      | 0,009      |
| [30;34]   | 0,874      | 0,112      | 0,014      |
| [35;39]   | 0,848      | 0,132      | 0,020      |
| [40;44]   | 0,808      | 0,162      | 0,030      |
| [45;49]   | 0,766      | 0,191      | 0,043      |
| [50;54]   | 0,710      | 0,227      | 0,064      |
| [55;59]   | 0,622      | 0,281      | 0,098      |
| [60;64]   | 0,527      | 0,331      | 0,143      |
| [65;69]   | 0,435      | 0,367      | 0,197      |
| [70;74]   | 0,348      | 0,390      | 0,262      |
| $\geq 75$ | 0,218      | 0,364      | 0,418      |

$p_{1m}^i$  are directly informed by Clark et al. [1].

| Age class | $p^2_{2m}$ | $p^3_{2m}$ | $p^4_{2m}$ |
|-----------|------------|------------|------------|
| [0;4]     | 0,9969     | 0,0028     | 0,0003     |
| [5;9]     | 0,9960     | 0,0037     | 0,0003     |
| [10;14]   | 0,9956     | 0,0042     | 0,0003     |
| [15;19]   | 0,9923     | 0,0078     | 0,0009     |
| [20;24]   | 0,9853     | 0,0133     | 0,0015     |
| [25;29]   | 0,9774     | 0,0200     | 0,0027     |
| [30;34]   | 0,9692     | 0,0266     | 0,0042     |
| [35;39]   | 0,9602     | 0,0338     | 0,0060     |
| [40;44]   | 0,9457     | 0,0453     | 0,0090     |
| [45;49]   | 0,9284     | 0,0588     | 0,0129     |
| [50;54]   | 0,9030     | 0,0789     | 0,0192     |
| [55;59]   | 0,8609     | 0,1108     | 0,0294     |
| [60;64]   | 0,8084     | 0,1498     | 0,0429     |
| [65;69]   | 0,7470     | 0,1930     | 0,0591     |
| [70;74]   | 0,6795     | 0,2419     | 0,0786     |
| $\geq 75$ | 0,5274     | 0,3472     | 0,1254     |

$p^j_{2m}$  are calculated assuming that  $p^2_{2m} = p^2_{1m} + (1-0.5*0.3)p^3_{1m}$ ,  $p^3_{2m} = 0.7*p^4_{1m} + 0.5*0.3*p^3_{1m}$  and  $p^4_{2m} = 0.3*p^4_{1m}$ .

| Age class | $p^2_{3m}$ | $p^3_{3m}$ | $p^4_{3m}$ |
|-----------|------------|------------|------------|
| [0;4]     | 0,985      | 0,015      | 0,000      |
| [5;9]     | 0,979      | 0,021      | 0,000      |
| [10;14]   | 0,976      | 0,024      | 0,000      |
| [15;19]   | 0,960      | 0,041      | 0,000      |
| [20;24]   | 0,930      | 0,070      | 0,000      |
| [25;29]   | 0,900      | 0,100      | 0,000      |
| [30;34]   | 0,874      | 0,126      | 0,000      |
| [35;39]   | 0,848      | 0,152      | 0,000      |
| [40;44]   | 0,808      | 0,192      | 0,000      |
| [45;49]   | 0,766      | 0,234      | 0,000      |
| [50;54]   | 0,710      | 0,291      | 0,000      |
| [55;59]   | 0,622      | 0,379      | 0,000      |
| [60;64]   | 0,527      | 0,474      | 0,000      |
| [65;69]   | 0,435      | 0,564      | 0,000      |
| [70;74]   | 0,348      | 0,652      | 0,000      |
| $\geq 75$ | 0,218      | 0,782      | 0,000      |

$p^j_{3m}$  are calculated assuming that  $p^2_{3m} = p^2_{1m}$ ,  $p^3_{3m} = p^4_{1m} + p^3_{1m}$  and  $p^4_{3m} = 0$ .

**Table S3.** Eligible age classes to vaccination by month in the model.

| Month    | Eligible age class | Month     | Eligible age class |
|----------|--------------------|-----------|--------------------|
| January  | $\geq 75$          | July      | $\geq 10$          |
| February | $\geq 75$          | August    | $\geq 10$          |
| March    | $\geq 60$          | September | $\geq 10$          |
| April    | $\geq 50$          | October   | $\geq 10$          |
| May      | $\geq 20$          | November  | $\geq 10$          |
| June     | $\geq 10$          | December  | $\geq 10$          |

**Table S4.** Vaccine coverage with at least one dose at the end of each month informed by vaccination French database VAC-SI (Système d'Informations pour le suivi de la VACCination).

| Month    | Vaccine coverage with at least one dose at the end of each month (%) |
|----------|----------------------------------------------------------------------|
| January  | 2.45                                                                 |
| February | 4.60                                                                 |
| March    | 12.22                                                                |
| April    | 23.63                                                                |
| May      | 38.85                                                                |
| June     | 50.64                                                                |

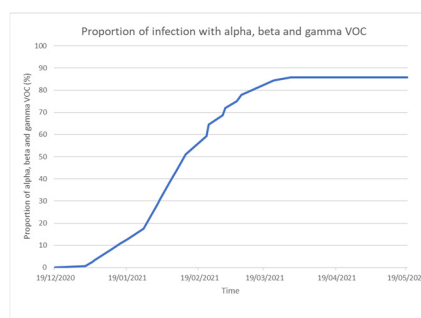

**Figure S1.** Proportion of alpha, beta or gamma Variants Of Concern (VOC) infections among all COVID-19 infections from French surveillance database SI-DEP (Système d'Informations de DEPistage) and Santé Publique France surveys from January 2021 to May 2021.

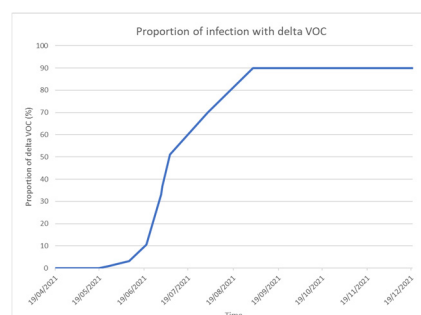

**Figure S2.** Proportion of delta Variant Of Concern (VOC) infections among all COVID-19 infections from French surveillance database SI-DEP (Système d'Informations de DEPistage) from May 2021 to July 2021 and from ECDC's (European Centre for Disease Prevention and Control) projections from July to August 2021.

**Table S5.** Contact matrices for pre-pandemic contacts at home, at school, at work and other contacts in France, provided by Prem et. al [2].

|    | HOME     |          |          |          |          |          |          |          |          |          |          |          |          |          |          |          |
|----|----------|----------|----------|----------|----------|----------|----------|----------|----------|----------|----------|----------|----------|----------|----------|----------|
|    | 0        | 5        | 10       | 15       | 20       | 25       | 30       | 35       | 40       | 45       | 50       | 55       | 60       | 65       | 70       | 75       |
| 0  | 0,688061 | 0,47768  | 0,19942  | 0,080462 | 0,134592 | 0,379075 | 0,702365 | 0,571827 | 0,198565 | 0,066211 | 0,052676 | 0,036809 | 0,02239  | 0,006494 | 0,002993 | 0,00522  |
| 5  | 0,325932 | 1,009634 | 0,385944 | 0,126838 | 0,037585 | 0,145181 | 0,573297 | 0,714298 | 0,468638 | 0,129078 | 0,03717  | 0,022007 | 0,011999 | 0,006392 | 0,002603 | 0,003312 |
| 10 | 0,128181 | 0,369161 | 1,588507 | 0,421811 | 0,059928 | 0,026051 | 0,126748 | 0,457233 | 0,63762  | 0,272502 | 0,063979 | 0,014102 | 0,008759 | 0,0083   | 0,006661 | 0,003335 |
| 15 | 0,047173 | 0,096142 | 0,392455 | 1,254115 | 0,206093 | 0,032457 | 0,017091 | 0,168149 | 0,401699 | 0,495991 | 0,189244 | 0,042055 | 0,009506 | 0,007754 | 0,00499  | 0,002221 |
| 20 | 0,096405 | 0,047508 | 0,072079 | 0,390331 | 1,191402 | 0,197242 | 0,04027  | 0,01859  | 0,117882 | 0,487593 | 0,271308 | 0,112326 | 0,014587 | 0,002322 | 0,0024   | 0,002529 |
| 25 | 0,366726 | 0,096787 | 0,025564 | 0,055108 | 0,207189 | 1,014666 | 0,195743 | 0,028819 | 0,013956 | 0,05159  | 0,209117 | 0,098403 | 0,037097 | 0,007793 | 0,000856 | 0,004342 |
| 30 | 0,519928 | 0,475619 | 0,163414 | 0,023519 | 0,046657 | 0,19064  | 0,932506 | 0,199322 | 0,053371 | 0,015524 | 0,030213 | 0,051241 | 0,050143 | 0,007601 | 0,003313 | 0,003024 |
| 35 | 0,447115 | 0,711948 | 0,552992 | 0,193906 | 0,023157 | 0,030994 | 0,163766 | 1,042591 | 0,164947 | 0,03814  | 0,019008 | 0,014456 | 0,027545 | 0,012462 | 0,006892 | 0,002375 |
| 40 | 0,169285 | 0,41168  | 0,661424 | 0,441584 | 0,088938 | 0,022194 | 0,059488 | 0,159125 | 0,867285 | 0,144631 | 0,028336 | 0,004299 | 0,015838 | 0,014718 | 0,005351 | 0,005975 |
| 45 | 0,08251  | 0,180596 | 0,361976 | 0,618391 | 0,36123  | 0,051807 | 0,02151  | 0,064652 | 0,144427 | 0,796167 | 0,124662 | 0,0233   | 0,007601 | 0,00722  | 0,005596 | 0,008886 |
| 50 | 0,125564 | 0,103706 | 0,201282 | 0,338546 | 0,390068 | 0,230417 | 0,065329 | 0,033642 | 0,060287 | 0,166583 | 0,74747  | 0,132954 | 0,021398 | 0,00577  | 0,004745 | 0,021755 |
| 55 | 0,233811 | 0,217834 | 0,146832 | 0,233026 | 0,270983 | 0,290321 | 0,213433 | 0,060539 | 0,027171 | 0,107779 | 0,221376 | 0,866688 | 0,125525 | 0,034265 | 0,004821 | 0,01819  |
| 60 | 0,261257 | 0,23384  | 0,163821 | 0,135336 | 0,107688 | 0,169806 | 0,261427 | 0,158204 | 0,075378 | 0,033413 | 0,086644 | 0,193533 | 0,908575 | 0,109923 | 0,022561 | 0,0055   |
| 65 | 0,139879 | 0,214505 | 0,200491 | 0,107827 | 0,065775 | 0,082189 | 0,144265 | 0,149013 | 0,127643 | 0,055598 | 0,047119 | 0,079539 | 0,126782 | 0,691952 | 0,090216 | 0,011954 |
| 70 | 0,081573 | 0,242322 | 0,234412 | 0,213315 | 0,031554 | 0,065307 | 0,060626 | 0,164654 | 0,141832 | 0,130553 | 0,062974 | 0,036982 | 0,115141 | 0,185317 | 0,52601  | 0,108659 |
| 75 | 0,199006 | 0,248851 | 0,384293 | 0,301761 | 0,073838 | 0,074449 | 0,094919 | 0,190461 | 0,264034 | 0,204618 | 0,357401 | 0,140654 | 0,055149 | 0,103625 | 0,110188 | 0,42997  |

|    | SCHOOL   |          |          |          |          |          |          |          |          |          |          |          |          |           |           |           |
|----|----------|----------|----------|----------|----------|----------|----------|----------|----------|----------|----------|----------|----------|-----------|-----------|-----------|
|    | 0        | 5        | 10       | 15       | 20       | 25       | 30       | 35       | 40       | 45       | 50       | 55       | 60       | 65        | 70        | 75        |
| 0  | 2,423317 | 0,316795 | 0,056616 | 0,061873 | 0,016538 | 0,086418 | 0,159975 | 0,131168 | 0,062385 | 0,073877 | 0,039413 | 0,026864 | 0,002379 | 0,000823  | 8,27E-66  | 6,40E-120 |
| 5  | 0,396403 | 2,693404 | 0,149118 | 0,016606 | 0,01669  | 0,055242 | 0,074119 | 0,07873  | 0,07744  | 0,055006 | 0,04699  | 0,015159 | 0,004197 | 0,001096  | 0,000348  | 8,10E-39  |
| 10 | 0,003278 | 0,57892  | 3,343917 | 0,10431  | 0,01068  | 0,042896 | 0,044908 | 0,080341 | 0,085068 | 0,066506 | 0,047289 | 0,024727 | 0,00449  | 0,000572  | 4,94E-25  | 0,000182  |
| 15 | 0,019842 | 0,024969 | 1,045318 | 3,605976 | 0,043691 | 0,048554 | 0,055761 | 0,08817  | 0,075296 | 0,088394 | 0,049428 | 0,030491 | 0,004869 | 0,000825  | 6,22E-33  | 1,71E-70  |
| 20 | 0,022229 | 0,013345 | 0,005293 | 0,446844 | 0,257036 | 0,033255 | 0,022805 | 0,030292 | 0,019724 | 0,024325 | 0,013184 | 0,00966  | 0,000622 | 0,001128  | 0,000177  | 1,22E-47  |
| 25 | 0,027886 | 0,076988 | 0,02407  | 0,124165 | 0,184199 | 0,126952 | 0,022679 | 0,032915 | 0,040019 | 0,035284 | 0,009371 | 0,015596 | 0,004081 | 0,002166  | 0,000463  | 0,001287  |
| 30 | 0,056356 | 0,264675 | 0,174398 | 0,110956 | 0,03436  | 0,070986 | 0,065925 | 0,050138 | 0,0559   | 0,029315 | 0,024374 | 0,003783 | 0,005294 | 0,000404  | 1,66E-48  | 3,11E-55  |
| 35 | 0,105979 | 0,17561  | 0,128075 | 0,065077 | 0,014619 | 0,050071 | 0,071387 | 0,058714 | 0,067007 | 0,032327 | 0,004871 | 0,011483 | 0,000584 | 0,001916  | 1,85E-123 | 9,71E-67  |
| 40 | 0,034648 | 0,102567 | 0,081044 | 0,326451 | 0,007181 | 0,025663 | 0,025759 | 0,038373 | 0,084545 | 0,030394 | 0,034463 | 0,00974  | 0,005925 | 0,000443  | 4,82E-68  | 2,41E-92  |
| 45 | 0,290592 | 0,230712 | 0,148747 | 0,530154 | 0,005225 | 0,032159 | 0,063435 | 0,060411 | 0,057917 | 0,035105 | 0,043871 | 0,020366 | 0,003608 | 0,001577  | 6,22E-134 | 3,28E-72  |
| 50 | 0,071845 | 0,385147 | 0,479616 | 0,511824 | 0,00535  | 0,016632 | 0,047436 | 0,051439 | 0,065808 | 0,090621 | 0,046598 | 0,025021 | 0,005172 | 8,47E-24  | 1,24E-117 | 5,65E-78  |
| 55 | 0,222714 | 0,373913 | 0,322418 | 0,365212 | 0,006354 | 0,065086 | 0,025817 | 0,047263 | 0,061043 | 0,044548 | 0,039369 | 0,043929 | 0,010233 | 1,10E-31  | 0,000783  | 0,000763  |
| 60 | 0,067492 | 0,052495 | 0,026763 | 0,124012 | 0,011289 | 0,001616 | 0,015128 | 0,004456 | 0,009915 | 0,015818 | 0,012666 | 0,006649 | 0,020707 | 0,010852  | 4,42E-67  | 2,12E-37  |
| 65 | 0,001774 | 0,021404 | 0,008328 | 5,82E-32 | 0,00177  | 0,001728 | 0,011233 | 0,004955 | 0,005022 | 0,008109 | 0,001858 | 0,014481 | 0,007931 | 0,017278  | 0,011123  | 3,46E-126 |
| 70 | 1,29E-28 | 5,11E-26 | 1,93E-40 | 0,007609 | 2,64E-22 | 1,70E-24 | 1,26E-26 | 0,007628 | 0,007858 | 0,021177 | 0,035255 | 0,02146  | 0,007741 | 0,008013  | 0,007913  | 0,021383  |
| 75 | 2,83E-94 | 0,021161 | 8,48E-42 | 0,021289 | 4,90E-36 | 0,007598 | 9,78E-69 | 2,23E-60 | 1,44E-48 | 8,57E-60 | 4,70E-42 | 1,60E-46 | 2,21E-83 | 8,86E-107 | 1,02E-80  | 6,61E-113 |

|    | WORK      |          |          |          |          |          |          |          |          |          |          |          |          |          |          |           |
|----|-----------|----------|----------|----------|----------|----------|----------|----------|----------|----------|----------|----------|----------|----------|----------|-----------|
|    | 0         | 5        | 10       | 15       | 20       | 25       | 30       | 35       | 40       | 45       | 50       | 55       | 60       | 65       | 70       | 75        |
| 0  | 0         | 0        | 0        | 0        | 0        | 0        | 0        | 0        | 0        | 0        | 0        | 0        | 0        | 8,21E-92 | 1,21E-05 | 3,16E-125 |
| 5  | 0         | 0        | 0        | 0        | 0        | 0        | 0        | 0        | 0        | 0        | 0        | 0        | 0        | 1,35E-05 | 7,65E-79 | 2,38E-65  |
| 10 | 0         | 0        | 0,014566 | 0,006934 | 0,010019 | 0,002899 | 0,02392  | 0,006819 | 0,024009 | 0,013956 | 0,005312 | 5,66E-09 | 1,58E-18 | 2,80E-53 | 4,96E-06 | 3,78E-102 |
| 15 | 0         | 0        | 0,012359 | 0,465661 | 0,504972 | 0,290428 | 0,273328 | 0,254158 | 0,284017 | 0,224052 | 0,126467 | 0,025944 | 0,001402 | 8,35E-06 | 2,86E-06 | 1,89E-31  |
| 20 | 0         | 0        | 0,021889 | 0,340347 | 0,891532 | 0,854474 | 0,719952 | 0,793497 | 0,60096  | 0,481606 | 0,353457 | 0,070204 | 0,005224 | 9,86E-06 | 1,33E-05 | 3,74E-06  |
| 25 | 0         | 0        | 0,028152 | 0,29917  | 0,848489 | 1,428921 | 1,032235 | 1,008132 | 0,934231 | 0,655398 | 0,517834 | 0,103426 | 0,006969 | 1,61E-05 | 1,01E-05 | 3,01E-06  |
| 30 | 0         | 0        | 0,032201 | 0,163215 | 0,593526 | 0,978649 | 1,292918 | 1,134236 | 1,019614 | 0,832958 | 0,482937 | 0,121815 | 0,006588 | 1,64E-05 | 4,10E-06 | 3,49E-06  |
| 35 | 0         | 0        | 0,019809 | 0,325651 | 0,492504 | 0,9195   | 0,994002 | 1,373982 | 1,340825 | 0,928444 | 0,649787 | 0,111775 | 0,00467  | 1,23E-05 | 9,14E-06 | 6,02E-06  |
| 40 | 0         | 0        | 0,022453 | 0,204014 | 0,581487 | 0,912221 | 1,086205 | 1,162794 | 1,428988 | 1,148896 | 0,793711 | 0,119043 | 0,006869 | 1,44E-05 | 1,03E-05 | 1,30E-05  |
| 45 | 0         | 0        | 0,029976 | 0,25517  | 0,396557 | 0,686163 | 0,888148 | 0,976758 | 1,013636 | 0,989896 | 0,612885 | 0,13482  | 0,005475 | 1,63E-05 | 1,08E-05 | 6,09E-06  |
| 50 | 0         | 0        | 0,03057  | 0,180021 | 0,311334 | 0,652409 | 0,767315 | 0,799289 | 1,085675 | 1,047858 | 0,765183 | 0,160481 | 0,006171 | 1,18E-05 | 1,18E-05 | 1,02E-05  |
| 55 | 0         | 0        | 0,020975 | 0,053869 | 0,093412 | 0,171829 | 0,241186 | 0,227484 | 0,291715 | 0,230261 | 0,205195 | 0,055507 | 0,002592 | 1,35E-05 | 6,59E-06 | 6,66E-06  |
| 60 | 0         | 0        | 0,001689 | 0,001742 | 0,008855 | 0,015784 | 0,017553 | 0,020751 | 0,022507 | 0,021991 | 0,01615  | 0,005389 | 0,000212 | 2,03E-05 | 8,26E-06 | 1,48E-05  |
| 65 | 7,60E-06  | 3,36E-06 | 7,65E-06 | 2,28E-05 | 3,15E-05 | 7,89E-05 | 7,24E-05 | 2,92E-05 | 6,62E-05 | 5,96E-05 | 7,71E-05 | 5,31E-05 | 4,66E-05 | 1,42E-05 | 2,49E-05 | 1,19E-05  |
| 70 | 5,79E-55  | 7,89E-42 | 2,55E-06 | 2,61E-05 | 1,68E-05 | 2,12E-05 | 3,57E-05 | 4,02E-05 | 3,56E-05 | 3,10E-05 | 2,13E-05 | 4,50E-05 | 2,61E-05 | 1,68E-05 | 1,67E-05 | 2,61E-05  |
| 75 | 2,36E-141 | 9,07E-97 | 1,19E-89 | 9,40E-22 | 4,66E-05 | 4,70E-05 | 4,69E-05 | 8,42E-05 | 2,78E-05 | 1,03E-05 | 1,07E-05 | 7,26E-75 | 1,10E-65 | 1,03E-05 | 5,17E-49 | 8,28E-43  |

|    | OTHER    |          |          |          |          |          |          |          |          |          |          |          |          |          |          |          |
|----|----------|----------|----------|----------|----------|----------|----------|----------|----------|----------|----------|----------|----------|----------|----------|----------|
|    | 0        | 5        | 10       | 15       | 20       | 25       | 30       | 35       | 40       | 45       | 50       | 55       | 60       | 65       | 70       | 75       |
| 0  | 0,693543 | 0,311971 | 0,155879 | 0,113034 | 0,190623 | 0,287716 | 0,346709 | 0,338489 | 0,234633 | 0,170371 | 0,214966 | 0,208538 | 0,161568 | 0,120728 | 0,084797 | 0,048645 |
| 5  | 0,339689 | 1,329525 | 0,475759 | 0,12955  | 0,109453 | 0,214681 | 0,2733   | 0,345402 | 0,299103 | 0,14732  | 0,123148 | 0,148272 | 0,160718 | 0,104148 | 0,055309 | 0,049799 |
| 10 | 0,106863 | 0,590358 | 2,038973 | 0,312856 | 0,206428 | 0,172536 | 0,207677 | 0,282532 | 0,333989 | 0,217512 | 0,149173 | 0,107785 | 0,08828  | 0,079298 | 0,063044 | 0,066149 |
| 15 | 0,057277 | 0,187355 | 0,851206 | 2,505921 | 0,605197 | 0,279758 | 0,184743 | 0,251656 | 0,263827 | 0,240537 | 0,113363 | 0,065412 | 0,055955 | 0,044238 | 0,029544 | 0,023918 |

**Table S6.** Definitions of perturbation matrices for contacts at school (S), at work (W) and other contacts (O).

| Perturbation matrices | Definitions                                                                                                                                                                   |
|-----------------------|-------------------------------------------------------------------------------------------------------------------------------------------------------------------------------|
| S2                    | School closure or national vacations                                                                                                                                          |
| S3                    | Zone A vacations                                                                                                                                                              |
| S4                    | Zones A and C vacations                                                                                                                                                       |
| S5                    | Zones B and C vacations                                                                                                                                                       |
| S6                    | Zone B vacations                                                                                                                                                              |
| O1                    | Closure of bars/restaurants, cinemas/theatres, non-essential businesses and travels restriction < 3 hours to < 20km from home (2 <sup>nd</sup> and 3 <sup>rd</sup> lockdowns) |
| O2                    | Closure of bars/restaurants, cinemas/theatres, non-essential businesses and strict travels restriction < 1 hours à < 1km (1 <sup>st</sup> lockdown)                           |
| O3                    | Closure of bars/restaurants, cinemas/theatres and curfew                                                                                                                      |
| W1                    | Obligatory to work from home if feasible (2 <sup>nd</sup> and 3 <sup>rd</sup> lockdowns)                                                                                      |
| W2                    | Strict obligatory to work from home, lay-off if not feasible (1 <sup>st</sup> lockdown)                                                                                       |
| W3                    | Recommendation to work from home                                                                                                                                              |

*Zone A: academies of Besançon, Bordeaux, Clermont-Ferrand, Dijon, Grenoble, Limoges, Lyon and Poitiers/  
Zone B: academies of Aix-Marseille, Amiens, Caen, Lille, Nancy-Metz, Nantes, Nice, Orléans-Tours, Reims, Rennes, Rouen and Strasbourg/ Zone C : academies of Créteil, Montpellier, Paris, Toulouse and Versailles*

**Table S7.** Percentage reduction in contacts by each perturbation matrices for contacts at school\*, at work and other contacts.

| Perturbation matrices | Percentage reduction in contacts at school | Percentage reduction in contacts at work | Percentage reduction in other contacts |
|-----------------------|--------------------------------------------|------------------------------------------|----------------------------------------|
| S2                    | -95%                                       |                                          |                                        |
| S3                    | -24%                                       |                                          |                                        |
| S4                    | -50%                                       |                                          |                                        |
| S5                    | -67%                                       |                                          |                                        |
| S6                    | -44%                                       |                                          |                                        |
| O1                    |                                            |                                          | -40% under 65<br>-70% over 65          |
| O2                    |                                            |                                          | -90% under 65<br>-95% over 65          |
| O3                    |                                            |                                          | -20% under 65<br>-50% over 65          |
| W1                    |                                            | -40%                                     |                                        |
| W2                    |                                            | -70%                                     |                                        |
| W3                    |                                            | -30%                                     |                                        |

*\*For contacts at school, we weighted the percentage reduction in contacts at school for each zone's vacations according to the population's size in each zone*

**Table S8.** Application periods of perturbation matrices for contacts at school (S), at work (W) and other contacts (O).

| Start      | End        | S | O | W | Start      | End        | S | O | W |
|------------|------------|---|---|---|------------|------------|---|---|---|
| 01/01/2020 | 12/03/2020 | 0 | 0 | 0 | 04/04/2021 | 06/04/2021 | 2 | 3 | 1 |
| 12/03/2020 | 14/03/2020 | 2 | 0 | 0 | 06/04/2021 | 26/04/2021 | 2 | 1 | 1 |
| 14/03/2020 | 17/03/2020 | 2 | 3 | 0 | 26/04/2021 | 03/05/2021 | 0 | 1 | 1 |
| 17/03/2020 | 02/06/2020 | 2 | 2 | 2 | 03/05/2021 | 12/05/2021 | 0 | 1 | 3 |
| 02/06/2020 | 22/06/2020 | 2 | 0 | 3 | 12/05/2021 | 16/05/2021 | 2 | 1 | 3 |
| 22/06/2020 | 04/07/2020 | 0 | 0 | 3 | 16/05/2021 | 18/05/2021 | 0 | 1 | 3 |
| 04/07/2020 | 01/09/2020 | 2 | 0 | 3 | 18/05/2021 | 20/06/2021 | 0 | 3 | 3 |
| 01/09/2020 | 17/10/2020 | 0 | 0 | 3 | 20/06/2021 | 06/07/2021 | 0 | 0 | 3 |
| 17/10/2020 | 30/10/2020 | 2 | 0 | 3 | 06/07/2021 | 01/09/2021 | 2 | 0 | 3 |
| 30/10/2020 | 01/11/2020 | 2 | 1 | 1 | 01/09/2021 | 23/10/2021 | 0 | 0 | 0 |
| 01/11/2020 | 15/12/2020 | 0 | 1 | 1 | 23/10/2021 | 08/11/2021 | 2 | 0 | 0 |
| 15/12/2020 | 19/12/2020 | 0 | 3 | 3 | 08/11/2021 | 18/12/2021 | 0 | 0 | 0 |
| 19/12/2020 | 04/01/2021 | 2 | 3 | 3 | 18/12/2021 | 01/01/2022 | 2 | 0 | 0 |
| 04/01/2021 | 06/02/2021 | 0 | 3 | 3 | 01/01/2022 | 07/02/2022 | 0 | 0 | 0 |
| 06/02/2021 | 13/02/2021 | 3 | 3 | 3 | 07/02/2022 | 14/02/2022 | 3 | 0 | 0 |
| 13/02/2021 | 22/02/2021 | 4 | 3 | 3 | 14/02/2022 | 21/02/2022 | 5 | 0 | 0 |
| 22/02/2021 | 01/03/2021 | 5 | 3 | 3 | 21/02/2022 | 28/02/2022 | 4 | 0 | 0 |
| 01/03/2021 | 07/03/2021 | 6 | 3 | 3 | 28/02/2022 | 07/03/2022 | 6 | 0 | 0 |
| 07/03/2021 | 04/04/2021 | 0 | 3 | 3 | 07/03/2022 | 01/04/2022 | 0 | 0 | 0 |

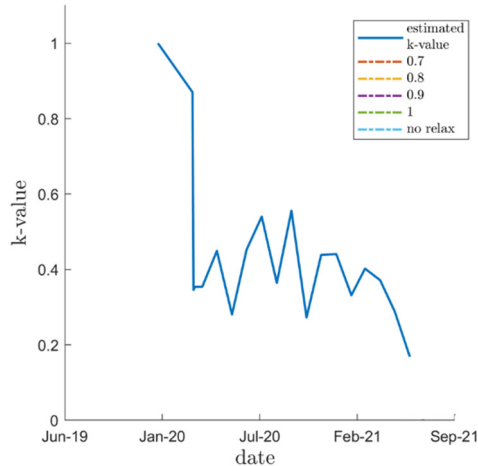

(a)

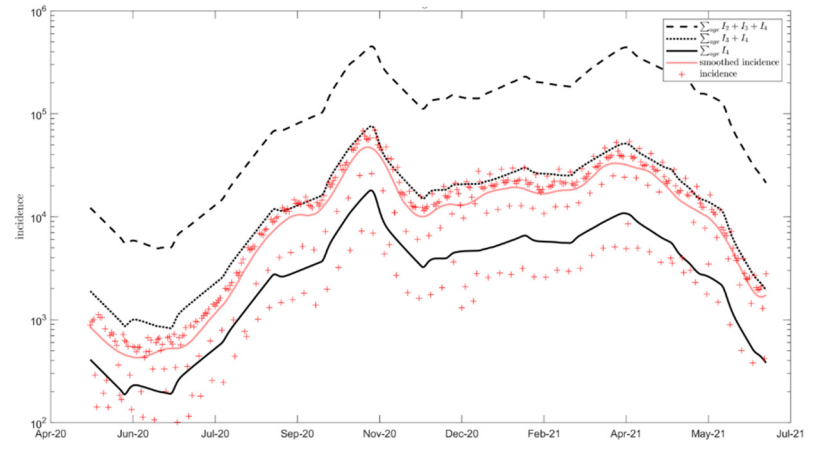

(b)

**Figure S3.** Calibration's plot for the 3 years immunity duration analysis. **(a)** K-value estimation from May 13<sup>th</sup>, 2020 to July 1<sup>st</sup>, 2021; **(b)** Model fit (logarithmic scale) from May 13<sup>th</sup>, 2020 to July 1<sup>st</sup>, 2021 to reported COVID-19 cases from French surveillance database (SI-DEP-Système d'Informations de DEPistage).

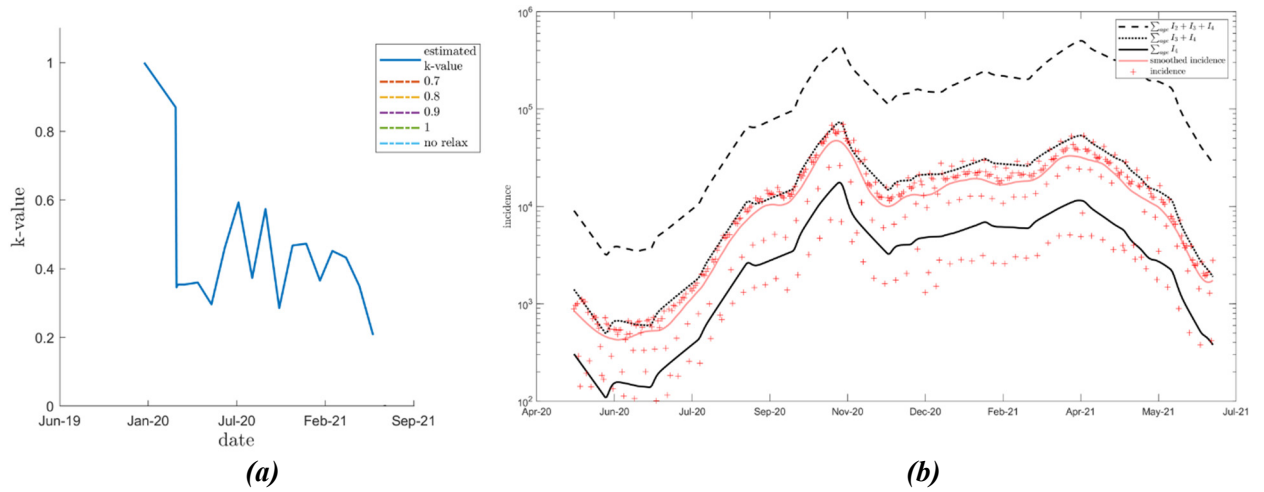

**Figure S4.** Calibration's plot for the no waning immunity analysis. **(a)** K-value estimation from May 13<sup>th</sup>, 2020 to July 1<sup>st</sup>, 2021; **(b)** Model fit (logarithmic scale) from May 13<sup>th</sup>, 2020 to July 1<sup>st</sup>, 2021 to reported COVID-19 cases from French surveillance database (SI-DEP-Système d'Informations de DEPistage).

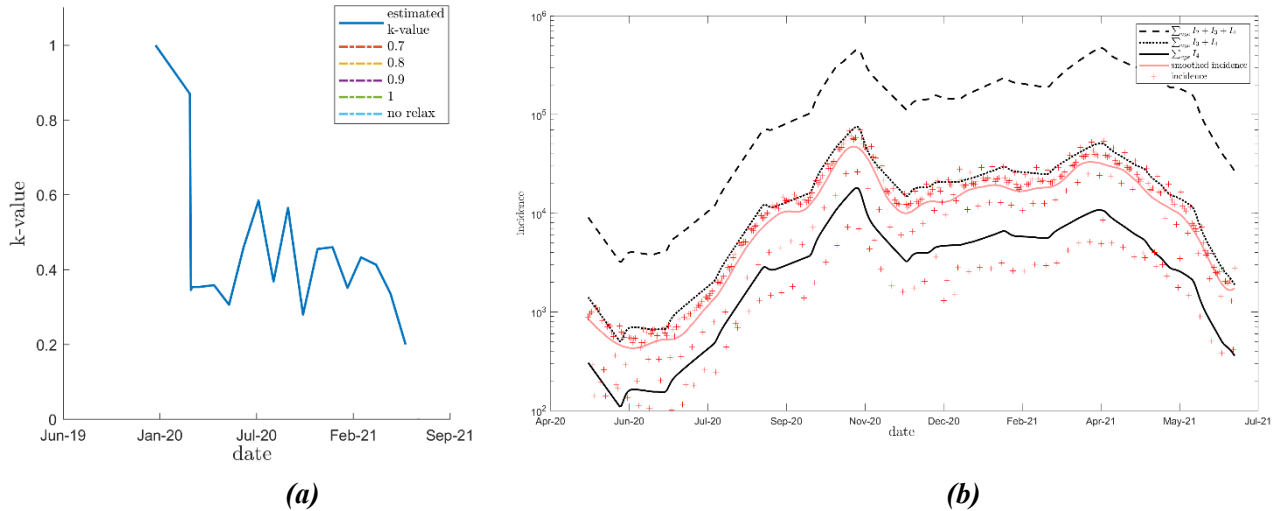

**Figure S5.** Calibration's plot for the 9 years waning immunity analysis with a better vaccine efficacy. **(a)** K-value estimation from May 13<sup>th</sup>, 2020 to July 1<sup>st</sup>, 2021; **(b)** Model fit (logarithmic scale) from May 13<sup>th</sup>, 2020 to July 1<sup>st</sup>, 2021 to reported COVID-19 cases from French surveillance database (SI-DEP-Système d'Informations de DEPistage).

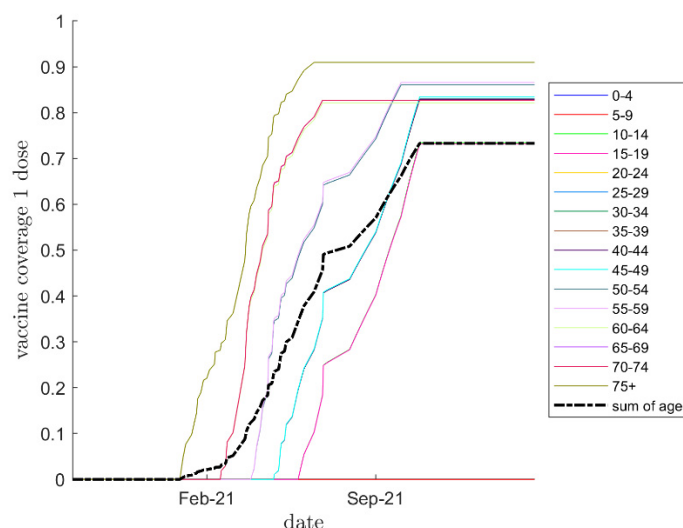

**Figure S6.** Proportion of the population vaccinated with at least one dose by age class, taking into account vaccine hesitancy.

**Table S9.** Proportion of the population vaccinated with at least one dose and vaccinated with 2 doses at the end of each month taking into account vaccine hesitancy.

| Month     | Proportion vaccinated with 1 or 2 doses (%) | Proportion vaccinated with 2 doses (%) |
|-----------|---------------------------------------------|----------------------------------------|
| January   | 1.4                                         | 0.4                                    |
| February  | 2.7                                         | 1.6                                    |
| March     | 10.6                                        | 4.7                                    |
| April     | 20.9                                        | 12.3                                   |
| May       | 34.4                                        | 23.3                                   |
| June      | 49.1                                        | 34.4                                   |
| July      | 50.9                                        | 44.1                                   |
| August    | 57.1                                        | 50.1                                   |
| September | 66.2                                        | 57.2                                   |
| October   | 73.3                                        | 65.4                                   |
| November  | 73.3                                        | 69.1                                   |
| December  | 73.3                                        | 70.3                                   |



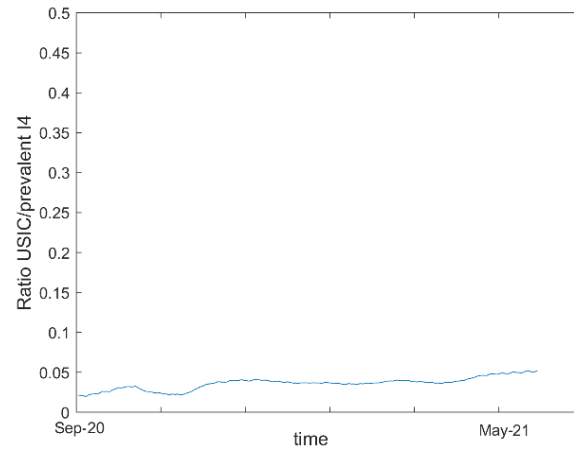

**Figure S7.** Ratio between intensive care units' (ICU) hospitalizations from SI-VIC database and prevalent  $I_4$  cases from September 1<sup>st</sup>, 2020 to May 31<sup>th</sup>, 2021. SI-VIC = Système d'Information pour le suivi des VICTimes d'attentats et de situations sanitaires exceptionnelles.

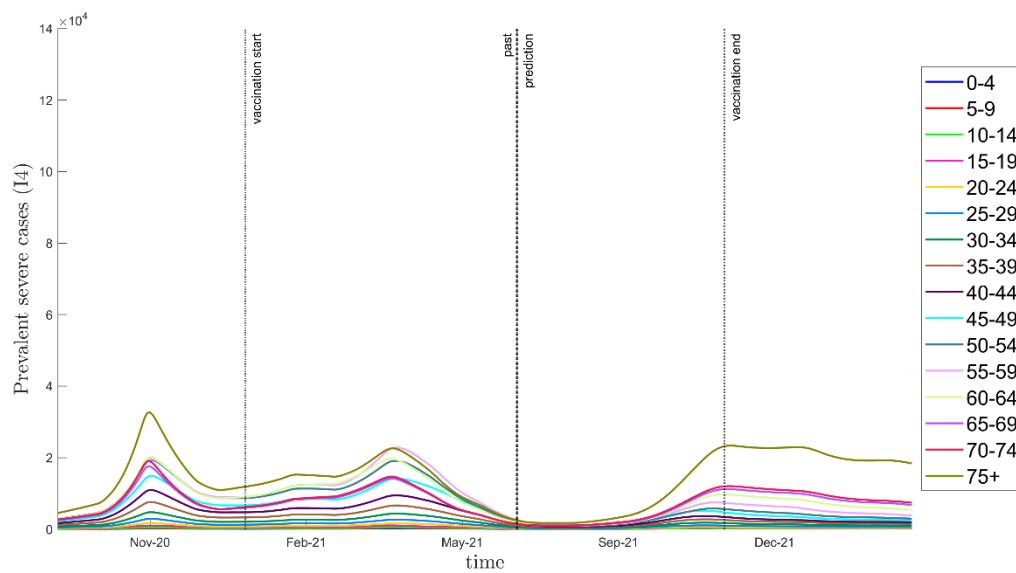

**Figure S8.** Prevalent severe cases  $I_4$  by age class in the no barrier gesture relaxation scenario, assuming that immunity wanes in 9 years (main analysis).

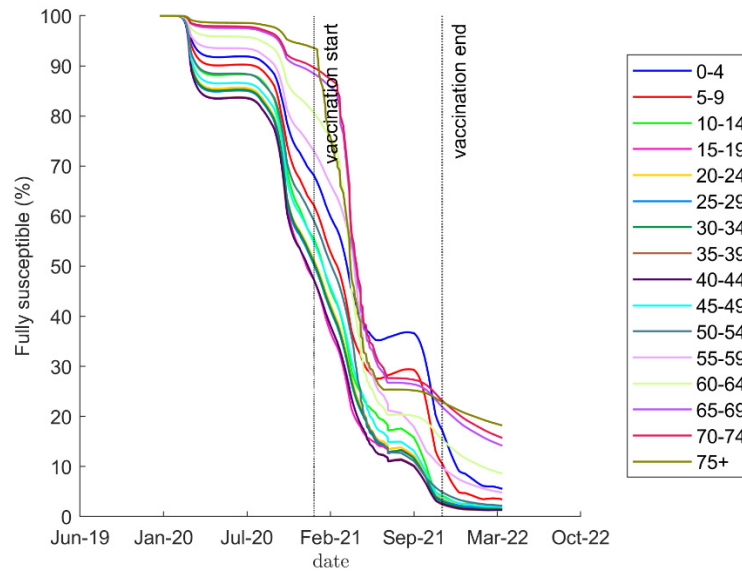

**Figure S9.** Proportion of fully susceptible individuals ( $S_1$ ) in each age class in the no barrier gesture relaxation scenario, assuming that immunity wanes in 9 years (main analysis).

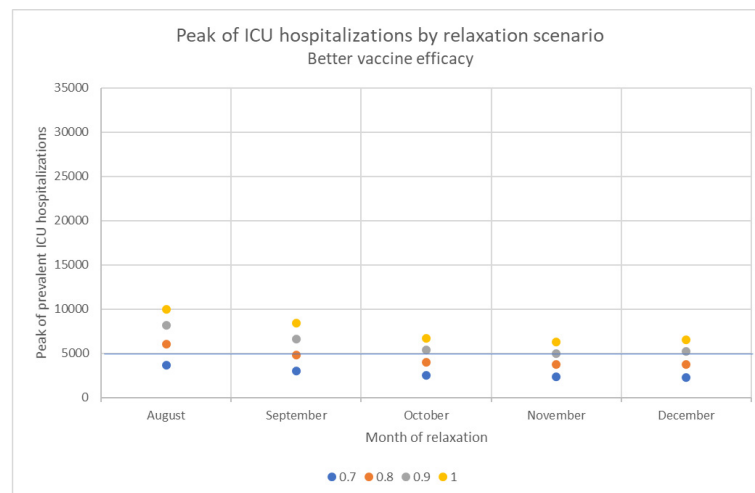

**Figure S10.** Peak of Intensive Care Units' hospitalizations (ICU) predicted in France from July 2021 following each relaxation scenario assuming a better vaccine efficacy. Relaxation scenarios: k-value (barrier gesture compliance index) raised either to 0.7, 0.8, 0.9 or 1 in August, September, October, November or December. Better vaccine efficacy = 70 and 90% vaccine efficacy against infections after 1 and 2 doses, respectively.

**Table S10.** Average variation of intensive care units' (ICU) hospitalizations peak predicted following each relaxation scenario assuming a better vaccine efficacy compared to the predictions obtained in the main analysis\*.

| Vaccine efficacy hypothesis                                                      | Average variation of ICU peak compared to main analysis** (%) |
|----------------------------------------------------------------------------------|---------------------------------------------------------------|
| 70% and 90% vaccine efficacy against infections after respectively 1 and 2 doses | -41.0                                                         |

\*Main analysis = 50 and 80% vaccine efficacy against infections after 1 and 2 doses, respectively.

\*Average value of the peak of ICU hospitalizations predicted following each relaxation scenario (k-value elevated to 0.7, 0.8, 0.9 or 1 in August, September, October, November and December).

**Table S11.** Average variation of intensive care units' (ICU) hospitalizations peak predicted following each relaxation scenario for each hypothesis of immunity duration compared to the predictions obtained in the 9 years immunity duration analysis (main analysis).

| Hypothesis of immunity duration | Average variation of ICU peak compared to main analysis* (%) |
|---------------------------------|--------------------------------------------------------------|
| 3 years immunity duration       | +86.1                                                        |
| No waning immunity              | -46.1                                                        |

\*Average value of the peak of ICU hospitalizations predicted following each relaxation scenario (k-value elevated to 0.7, 0.8, 0.9 or 1 in August, September, October, November and December)

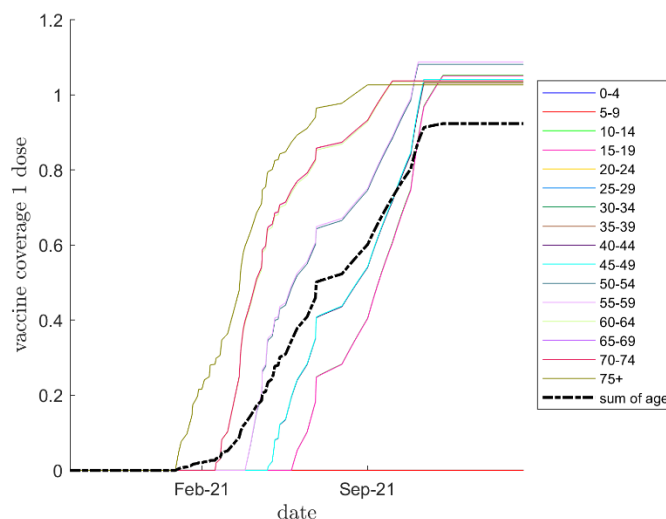

**Figure S11.** Proportion of the population vaccinated with at least one dose by age class assuming no vaccine hesitancy.

**Table S12.** Proportion of the population vaccinated with at least one dose and vaccinated with 2 doses at the end of each month assuming no vaccine hesitancy.

| Month     | Proportion vaccinated with 1 or 2 doses (%) | Proportion vaccinated with 2 doses (%) |
|-----------|---------------------------------------------|----------------------------------------|
| January   | 1.4                                         | 0.4                                    |
| February  | 2.7                                         | 1.6                                    |
| March     | 10.6                                        | 4.8                                    |
| April     | 21.0                                        | 12.4                                   |
| May       | 34.5                                        | 23.4                                   |
| June      | 50.2                                        | 34.5                                   |
| July      | 52.4                                        | 45.0                                   |
| August    | 60.2                                        | 52.1                                   |
| September | 72.7                                        | 61.3                                   |
| October   | 87.6                                        | 72.4                                   |
| November  | 92.4                                        | 83.2                                   |
| December  | 92.4                                        | 87.4                                   |

**Table S13.** Average variation of intensive care units' (ICU) hospitalizations peak predicted following each relaxation scenario assuming no vaccine hesitancy compared to the main analysis with vaccine hesitancy.

| Month of relaxation | Average variation of ICU peak compared to main analysis* (%) |
|---------------------|--------------------------------------------------------------|
| August              | -30.0                                                        |
| September           | -34.1                                                        |
| October             | -44.9                                                        |
| November            | -63.0                                                        |
| December            | -66.5                                                        |

\*Average value of the peak of ICU hospitalizations predicted following each relaxation scenario (k-value elevated to 0.7, 0.8, 0.9 or 1 for each month of relaxation)

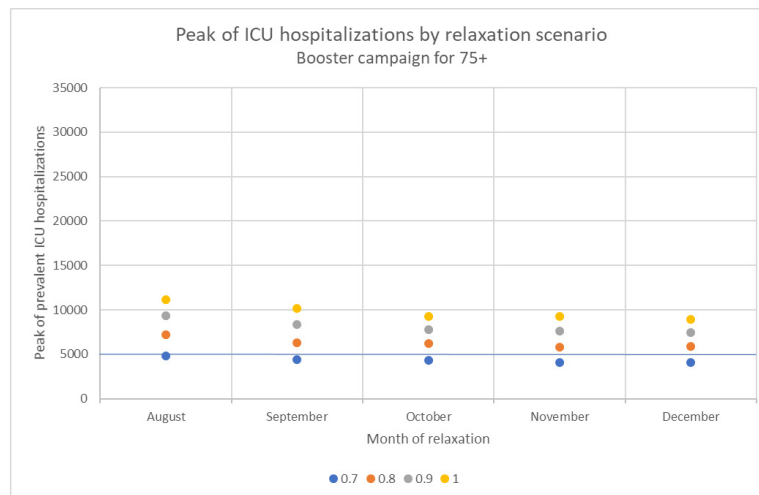

**Figure S12.** Peak of Intensive Care Units' hospitalizations (ICU) predicted in France from July 2021 following each relaxation scenario assuming a booster vaccination campaign on the September 1<sup>st</sup>, 2021 for the 75+. Relaxation scenarios: k-value (barrier gesture compliance index) raised either to 0.7, 0.8, 0.9 or 1 in August, September, October, November or December.

**Table S14.** Average variation of intensive care units' (ICU) hospitalizations peak predicted following each relaxation scenario assuming a booster vaccination campaign on the September 1<sup>st</sup>, 2021 for the 75+ compared to the main analysis without booster.

| Average variation of ICU peak compared to main analysis* (%) |       |
|--------------------------------------------------------------|-------|
| Booster vaccination campaign for the 75+                     | -16.3 |

\*Average value of the peak of ICU hospitalizations predicted following each relaxation scenario (k-value elevated to 0.7, 0.8, 0.9 or 1 in August, September, October, November and December)

## Reference

1. Clark, A.; Jit, M.; Warren-Gash, C.; Guthrie, B.; Wang, H. H. et al. Global, Regional, and National Estimates of the Population at Increased Risk of Severe COVID-19 Due to Underlying Health Conditions in 2020: A Modelling Study. *Lancet Glob. Health* **2020**, 8 (8), e1003–e1017.
2. Prem, K.; Zandvoort, K. V.; Klepac, P.; Eggo, R. M.; Davies, N. G. et al. Projecting contact matrices in 177 geographical regions: an update and comparison with empirical data for the COVID-19 era. *PLoS computational biology* **2021**, 17(7), e1009098.
